# Supplementary material for: Fast Screening of Protein Tyrosine Phosphatase 1B Inhibitor from Salvia miltiorrhiza Bge by Cell Display-Based Ligand Fishing
Source: MDPI journal article supplement (doi:10.3390/molecules27227896), 2022-11-15
Supplement: s1 [file s1]

## **Supporting Information**

### **Fast screening of protein tyrosine phosphatase 1B inhibitor from**

### ***Salvia miltiorrhiza* Bge by cell display-based ligand fishing**

Xiao-Lin Bai<sup>1,4</sup>, Wen-Qin Fan<sup>1,4</sup>, Ying-Jie Luo<sup>2</sup>, Yi-Pei Liu<sup>3</sup>, Yong-Mei Zhang<sup>1,\*</sup>, Xun Liao<sup>1,\*</sup>

#### **Affiliation:**

1. Chinese Academy of Sciences, Chengdu Institute of Biology, Chengdu, P. R. China
2. University of Western Australia, Perth 6000, Australia
3. Polus International College, Chengdu 610103, China
4. University of Chinese Academy of Sciences, Beijing 100049, China

#### **Corresponding Authors:**

Dr. Xun Liao, Email: liaoxun@cib.ac.cn; Tel: +86-28-828290402

Dr. Yong-Mei Zhang, Email: zhangym@cib.ac.cn; Tel: +86-28-82890756

## Contents of Supporting Information

|                                                                                                  |   |
|--------------------------------------------------------------------------------------------------|---|
| Table S1. NMR spectroscopic data (CD <sub>3</sub> OD) for salvianolic acid B .....               | 3 |
| Figure S1. <sup>13</sup> C NMR (150 MHz, CD <sub>3</sub> OD) spectrum of salvianolic acid B..... | 4 |
| Figure S2. <sup>1</sup> H NMR (600 MHz, CD <sub>3</sub> OD) spectrum of salvianolic acid B.....  | 5 |
| Figure S3. MS spectrum of salvianolic acid B (positive ion mode).....                            | 6 |
| Figure S4. IC <sub>50</sub> plot of salvianolic acid B and its chemical structure.....           | 7 |
| Figure S5 The authentication letter of crude drug sample.....                                    | 8 |
| Reference.....                                                                                   | 9 |

**Table S1.** NMR spectroscopic data (CD<sub>3</sub>OD) for salvianolic acid B [1]

| position | Reference  |                             |                         | This work  |                             |                         |
|----------|------------|-----------------------------|-------------------------|------------|-----------------------------|-------------------------|
|          | $\delta_c$ | type                        | $\Delta H$ ( $J$ in Hz) | $\delta_c$ | type                        | $\Delta H$ ( $J$ in Hz) |
| 2        | 87.5       | CH                          | 5.87 d (3.9)            | 88.3       | CH                          | 5.84 d (4.8)            |
| 3        | 57.1       | CH                          | 4.47 d (4.6)            | 57.9       | CH                          | 4.33 d (4.8)            |
| 4        | 124.6      | C                           |                         | 124.7      | C                           |                         |
| 5        | 121.6      | CH                          | 7.24 d (8.4)            | 121.7      | CH                          | 7.14 d (8.4)            |
| 6        | 118.2      | CH                          | 6.90 d (8.4)            | 118.4      | CH                          | 6.82 d (8.4)            |
| 7        | 148.6      | C                           |                         | 149.1      | C                           |                         |
| 8        | 146.2      | C                           |                         | 146.8      | C                           |                         |
| 9        | 126.1      | C                           |                         | 126.4      | C                           |                         |
| $\alpha$ | 117.1      | $\alpha\text{CH}=\text{CH}$ | 6.28 d (15.9)           | 117.3      | $\alpha\text{CH}=\text{CH}$ | 6.18 d (15.6)           |
| $\beta$  | 142.8      | $\beta\text{CH}=\text{CH}$  | 7.62 d (15.9)           | 142.6      | $\beta\text{CH}=\text{CH}$  | 7.50 d (15.6)           |
| 9        | 126.1      | C                           |                         | 126.4      | C                           |                         |
| 1'       | 133.3      | C                           |                         | 133.7      | C                           |                         |
| 2'       | 117.1      | CH                          | 6.83 dd (1.8, 6.3)      | 117.3      | CH                          | 6.72 overlap            |
| 3'       | 116.0      | CH                          | 6.80 d (8.1)            | 116.4      | CH                          | 6.75 overlap            |
| 4'       | 144.7      | C                           |                         | 146.0      | C                           |                         |
| 5'       | 145.5      | C                           |                         | 146.1      | C                           |                         |
| 6'       | 113.2      | CH                          | 6.82 d (1.9)            | 113.4      | CH                          | 6.73 overlap            |
| 1''      | 128.7      | C                           |                         | 128.9      | C                           |                         |
| 2''      | 116.1      | CH                          | 6.67                    | 116.6      | CH                          | 6.5                     |
| 3''      | 146.0      | C                           |                         | 146.6      | C                           |                         |
| 4''      | 145.5      | C                           |                         | 146.1      | C                           |                         |
| 5''      | 116.1      | CH                          | 6.65 d (8.0)            | 116.5      | CH                          | 6.52 d (8.0)            |
| 6''      | 121.7      | CH                          | 6.45 dd (1.5, 8.0)      | 122.1      | CH                          | 6.28 dd (2.4, 8.4)      |
| 7''      | 37.4       | CH <sub>2</sub>             | 3.06                    | 37.9       | CH <sub>2</sub>             | 3.04                    |
| 8''      | 73.9       | CH                          | 5.21 d (8.7)            | 74.7       | CH                          | 5.16 overlap            |
| 9''      | 171.6      | COOH                        |                         | 171.7      | COOH                        |                         |
| 10''     | 166.6      | C                           |                         | 166.0      | C                           |                         |
| 1'''     | 129.1      | C                           |                         | 129.3      | C                           |                         |
| 2'''     | 116.8      | CH                          | 6.71 d (1.7)            | 116.6      | CH                          | 6.63 overlap            |
| 3'''     | 144.6      | C                           |                         | 145.1      | C                           |                         |
| 4'''     | 144.4      | C                           |                         | 145.1      | C                           |                         |
| 5'''     | 117.3      | CH                          | 6.74 d (8.0)            | 117.6      | CH                          | 6.68 d (7.8)            |
| 6'''     | 121.8      | CH                          | 6.70 dd (1.6, 8.6)      | 122.3      | CH                          | 6.60 dd (1.7, 7.8)      |
| 7'''     | 37.1       | CH <sub>2</sub>             | 3.06                    | 37.5       | CH <sub>2</sub>             | 2.98                    |
| 8'''     | 74.9       | CH                          | 5.22 d (9.0)            | 75.6       | CH                          | 5.16 overlap            |
| 9'''     | 170.8      | COOH                        |                         | 172.6      | COOH                        |                         |
| 10'''    | 171.2      | C=O                         |                         | 172.3      | C=O                         |                         |

Note: For the position number, e.g., 1', 1'', and 1''' et. al., refer to the chemical structure shown in Fig. S4.

**Figure S1.**  $^{13}\text{C}$  NMR (150 MHz,  $\text{CD}_3\text{OD}$ ) spectrum of salvianolic acid B

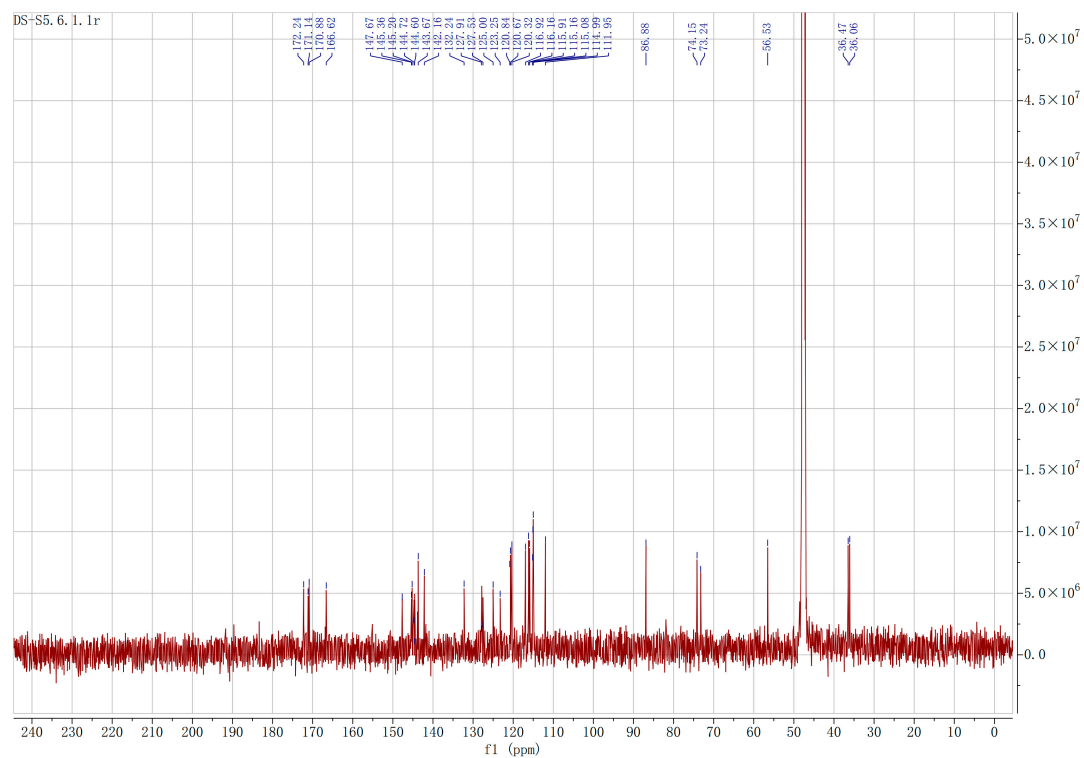

**Figure S2.**  $^1\text{H}$  NMR (600 MHz,  $\text{CD}_3\text{OD}$ ) spectrum of salvianolic acid B

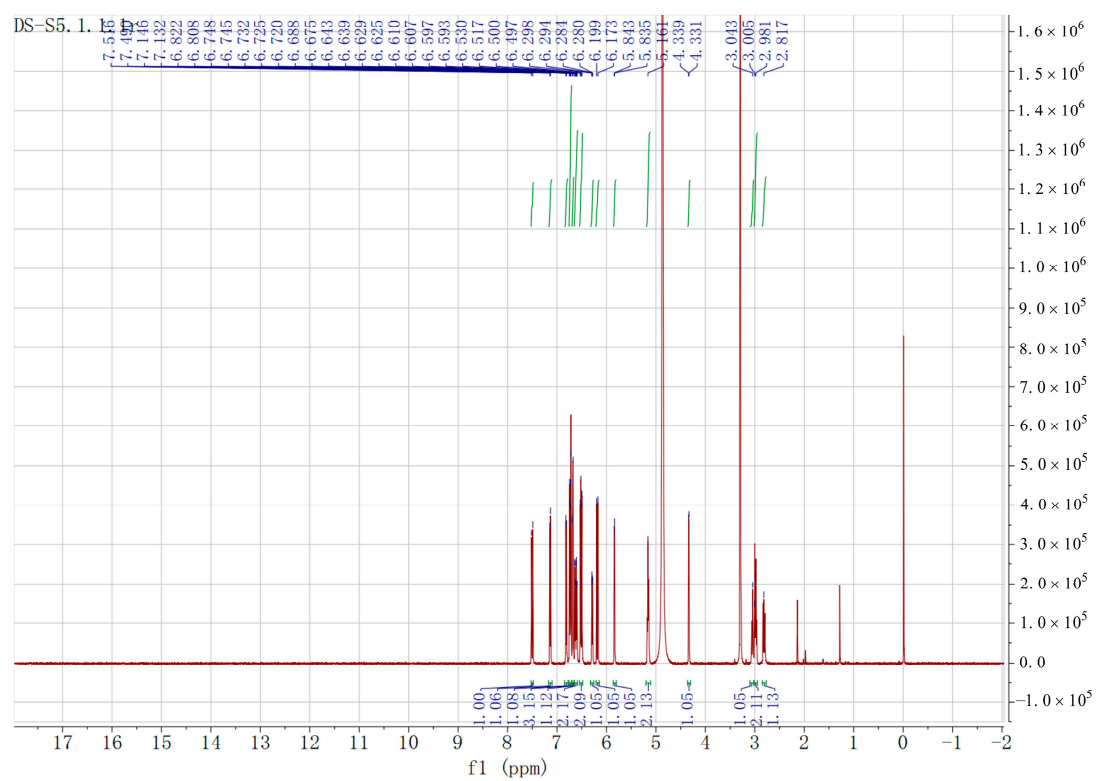

**Figure S3.** MS spectrum of salvianolic acid B (positive ion mode).

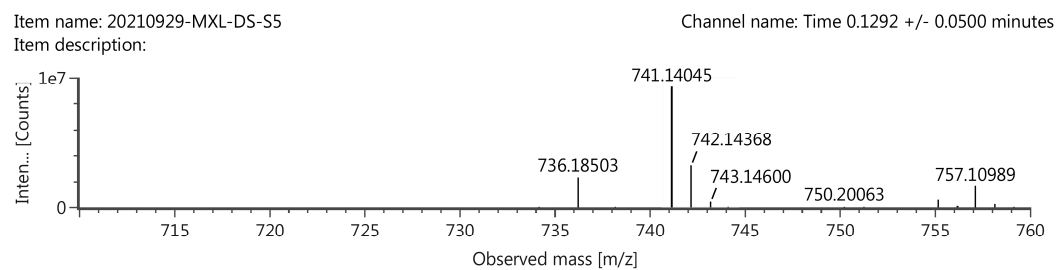

**Figure S4.** IC<sub>50</sub> plot of salvianolic acid B and its chemical structure.

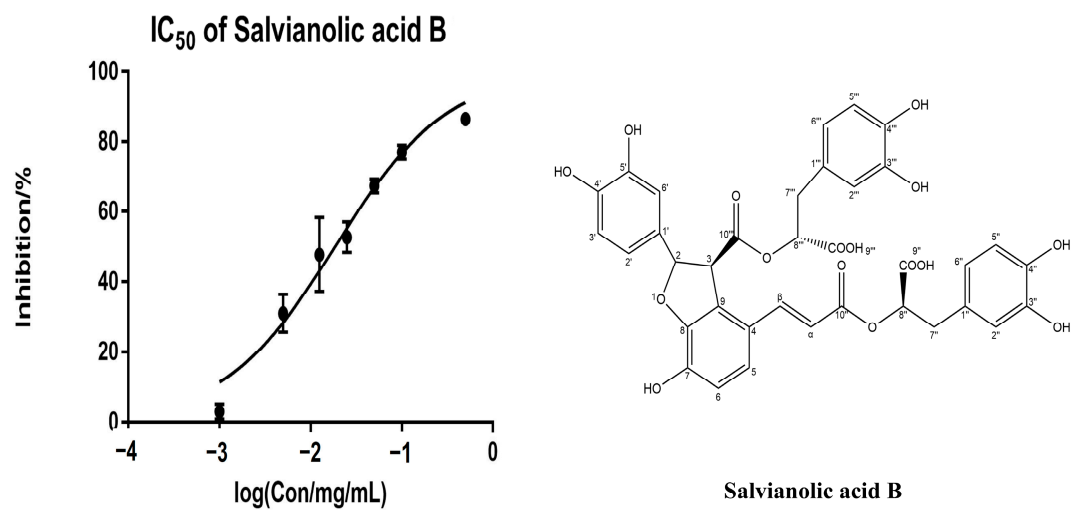

**Figure S5.** The authentication letter of crude drug sample.

The authentication letter of crude drug sample

The plant (*Salvia miltiorrhiza* Bunge) was collected from the fields of Wansheng Agricultural Company of Zhongjiang, it was deposited in the Chengdu Institute of Biology, Chinese Academy of Sciences, and its voucher specimen was 2019-07.

Dr. ZHANG Yong-Mei

Herbarium,  
Chengdu Institute of Biology,  
Chinese Academy of Sciences



## Reference

- [1] Sun, Y.; Zhu, H.; Wang, J.; Liu, Z.; Bi, J., Isolation and purification of salvianolic acid A and salvianolic acid B from *Salvia miltiorrhiza* by high-speed counter-current chromatography and comparison of their antioxidant activity. *J. Chromatogr. B: Anal. Technol. Biomed. Life Sci.* **2009**, 877, 733-737.
